# Supplementary material
Source: HighWire-hosted journal article supplement (http://jmg.bmjjournals.com/highwire/filestream/160691/field_highwire_adjunct_files/0/JMG_TableS1_067553.pdf)
Supplement: JMG_TableS1_067553.pdf [file JMG_TableS1_067553.pdf]

**Table 1. PCR primers *C20orf7* and *CRLS1*.**

| PCR primers 5' → 3' |                          |                           |                   |
|---------------------|--------------------------|---------------------------|-------------------|
| Gene-Exon           | Forward                  | Reverse                   | Product size (bp) |
| C20orf7-Ex1         | GCACGTTCCCTCGAGAAGAT     | TAGCGGAGAGGAAAACAAGC      | 379               |
| C20orf7-Ex2         | TGTTTCCTGGTGGTTTGAGA     | AGTGGATTCAGGCTTGGAGA      | 442               |
| C20orf7-Ex3         | AAGCTGGCTCATCACAAGGT     | TGTTGCAAGCTAAACTGATTAGGA  | 371               |
| C20orf7-Ex4         | TTGAATACGCATACTCATGTTCTC | TGATATTTCTGTATGAGTTCCTTTT | 400               |
| C20orf7-Ex5         | CCTTCTCTGTGCCACCTTTG     | TCCTGACCTCAAGAGATTCACTC   | 391               |
| C20orf7-Ex6         | ACGATCAGTGGATTTGGATATG   | TGCACAGTTCCTAAGCTTTTCA    | 423               |
| C20orf7-Ex7         | TGATTTTCTGACAGTTGGTTGC   | TGCCATGAAACCATGAACAC      | 471               |
| C20orf7-Ex8         | TGATTTCTCTCACAATGCAGGA   | CTCTGTGACAGCTGCCTGGT      | 484               |
| C20orf7-Ex9         | TCGCTTTAGAGTCACTAAGAAACC | TGAGGGAGCCTTAACAGGAA      | 372               |
| C20orf7-Ex10-11     | TCCTTG TACCCATTTCTTTTTGA | GCTTAGAGTGCTTCTTGCTTCA    | 533               |
| CRLS1-Ex1           | AGCCCAGTGTCTGAGTGGTT     | CCACCCAGAGCTTGTTACCT      | 493               |
| CRLS1-Ex2           | TGTAGCTTCTGACTGAAGTTGATG | CAAGGAAAAGCAGGCTAAGG      | 343               |
| CRLS1-Ex3           | TGCTTTGTTCTGTTATGACATTT  | TTGTCTCTCAAGAGAAATCCTAAGC | 264               |
| CRLS1-Ex4           | AGCAGTTTGTGGTAAGGCTGA    | TCTTTTTGCTTTTTCTTAAATCA   | 250               |
| CRLS1-Ex5           | TCGAATTTTACAGCAATTGAAAA  | GTAAAACTGCCTGCCCAAC       | 400               |
| CRLS1-Ex6           | GGATCCAGTTGGCACTATTCA    | TCAGTGCTCAACAAATGCTGT     | 240               |
| CRLS1-Ex7           | TTCATTATGATTCCCGTTGC     | GCCCATGCTCTGGACTATGT      | 479               |
